# Supplementary material
Source: HighWire-hosted journal article supplement (https://bmjopen.bmj.com/content/11/12/e050165)
Supplement: inline-supplementary-material-2 [file inline-supplementary-material-2.pdf]

## Health care professional interview guide

|                      |                                                                                                                                                                                                                                                                                                                      |
|----------------------|----------------------------------------------------------------------------------------------------------------------------------------------------------------------------------------------------------------------------------------------------------------------------------------------------------------------|
| 1 Main question      | -Tell me about your professional career? Why did you come to work in this team?                                                                                                                                                                                                                                      |
| Stimulus question(s) | -Were you looking for anything in particular when you came to this type of practice?<br>-Did you have expectations or specific ideas concerning the practice when you came to work in the team?                                                                                                                      |
| 2 Main question      | -Can you tell us about a complex patient you are currently treating, alongside your team of colleagues?                                                                                                                                                                                                              |
| Stimulus question(s) | -What care do you provide this patient (you personally)?                                                                                                                                                                                                                                                             |
| 3 Main question      | -In relation to this patient and those close to them, why have you involved the team in the treatment?                                                                                                                                                                                                               |
| 4 Main question      | -Why do you not treat all patients this way?                                                                                                                                                                                                                                                                         |
| Stimulus question(s) | -Do you feel this way of working is specific to complex patients?<br>-Is this work undertaken because it is a condition specific to your field of expertise: for example, musculoskeletal disorders etc.?                                                                                                            |
| 5 Main question      | -Do you or the team treat this patient in a specific way compared with other patients?                                                                                                                                                                                                                               |
| Stimulus question(s) | -What specific demands are you faced with from this patient?<br>-How do you view them?<br>-Are there discussions between you and the patient?                                                                                                                                                                        |
| 6 Main question      | -What working relationships do you have with your professional colleagues and how do you work together to treat this patient?                                                                                                                                                                                        |
| Stimulus question(s) | -Can you tell us about care provided collectively for this specific patient?<br>-Is this patient's care provided in stages? If yes, what are they?<br>-What contribution do you make specifically?                                                                                                                   |
| 7 Main question      | -Are there any tools (care plans, meetings, letters) that you use among yourselves to treat this patient?                                                                                                                                                                                                            |
| Stimulus question(s) | -Do you train each other on the procedures or this condition?                                                                                                                                                                                                                                                        |
| 8 Main question      | -Have you ever sought advice or practical assistance from another professional in the health centre?                                                                                                                                                                                                                 |
| 9 Main question      | -Does another professional need to give approval before you can perform your own procedure?<br>- If so, is negotiation possible, and on what?                                                                                                                                                                        |
| 10 Main question     | -Are you ever faced with professional prescriptions during your work (from another health care professional)?<br>-If so, how do you view them? Is negotiation possible, and on what?                                                                                                                                 |
| 11 Main question     | -Do you ever look ahead at the collective treatment this patient receives (for example, deadline, interventions etc.)?<br>-If yes, are discussions between you initiated?                                                                                                                                            |
| 12 Main question     | -Do you ever refer a patient to one of your colleagues in the health centre?                                                                                                                                                                                                                                         |
| 13 Main question     | -Do you feel that the collective care provided here for this type of multimorbid patient and their carers provides them with any benefits?<br>-If yes, what?                                                                                                                                                         |
| Stimulus question(s) | -We know that the medical relationship is inseparable from the idea of trust: do you see any improvements in this regard or at least a different attitude on both sides? (For example, the patient making more requests to you or the team, more discussions, more information exchanged during these discussions?). |

|                      |                                                                                                                                                                                 |
|----------------------|---------------------------------------------------------------------------------------------------------------------------------------------------------------------------------|
| 14 Main question     | -Would you say that there are specific features of the care provided to this type of patient which is unique to your team (and is not found elsewhere)?                         |
| Stimulus question(s) | -Do these specific features have an impact on the way the patient and their caregiver are involved in the care? (for example, self-monitoring, adherence, self-management etc.) |
| 15 Main question     | -What other elements could be implemented to improve the management of this patient?                                                                                            |
